# Supplementary material for: Core–shell nano-structured carbon composites based on tannic acid for lithium-ion batteries
Source: Royal Society of Chemistry journal article supplement (doi:10.1039/c6ta07359j), 2016-01-01
Supplement: c6ta07359j1.pdf [file c6ta07359j1.pdf]

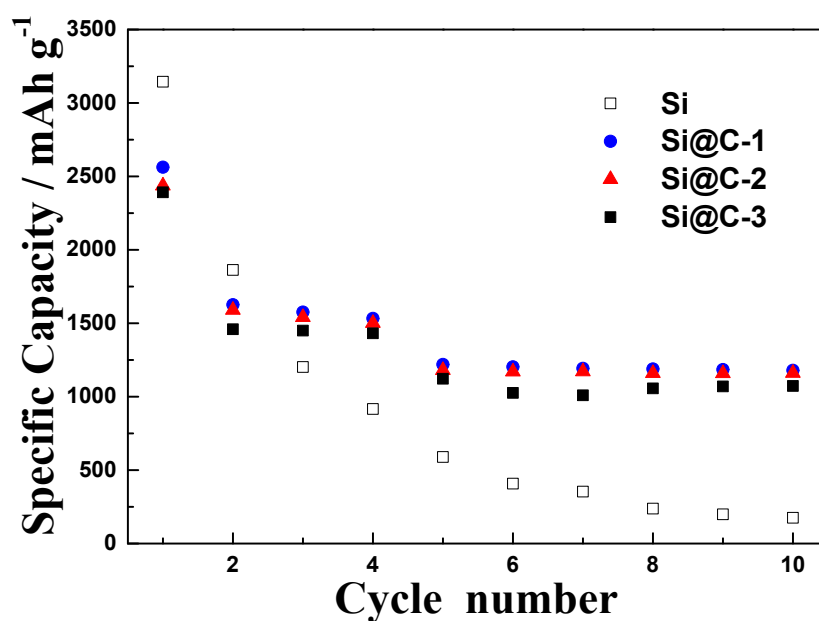

**Figure s1.** First 10 cycles' discharge capacity versus cycle number plots of Si and Si@C nanocomposites. The rate was 0.1 A g<sup>-1</sup> for one cycle, then 0.5 A g<sup>-1</sup> for 3 cycles and 1 A g<sup>-1</sup> for the later cycles.
